# Supplementary material
Source: PubMed Central journal article supplement (PMC5502804)
Supplement: NIHMS826990-supplement-2.pdf [file NIHMS826990-supplement-2.pdf]

Figure S1

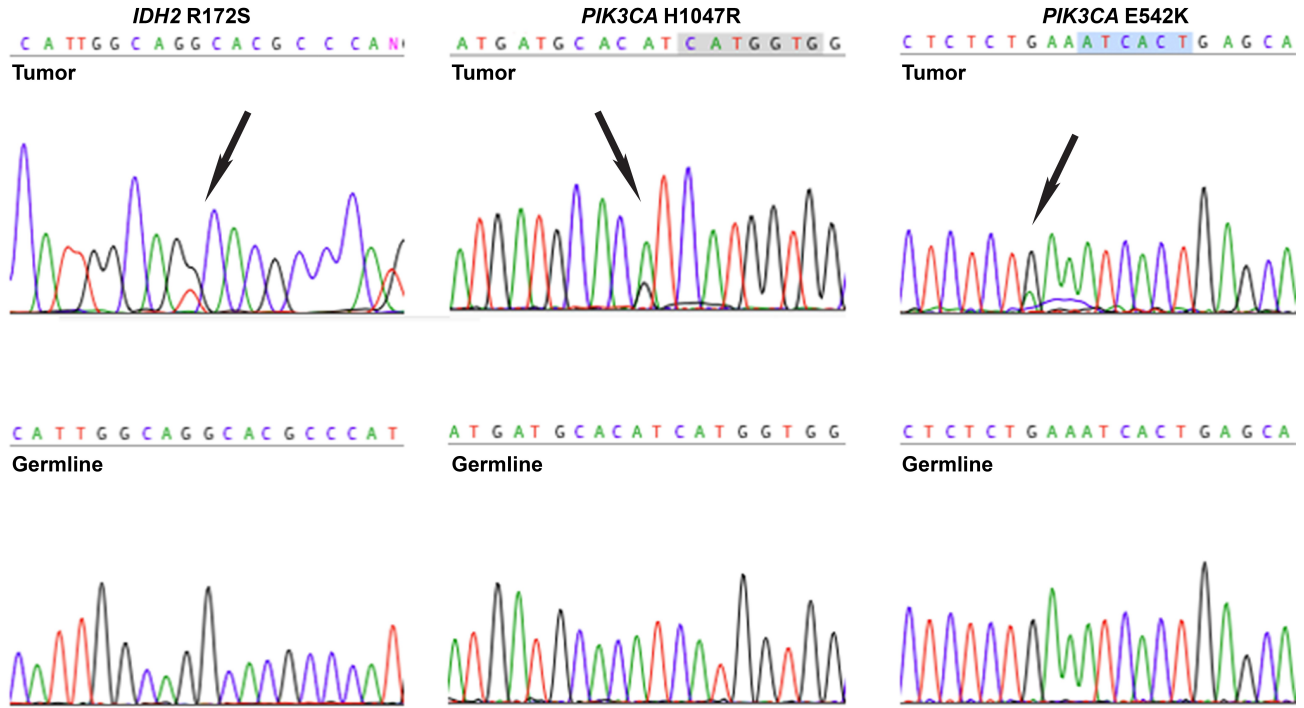

Figure S2

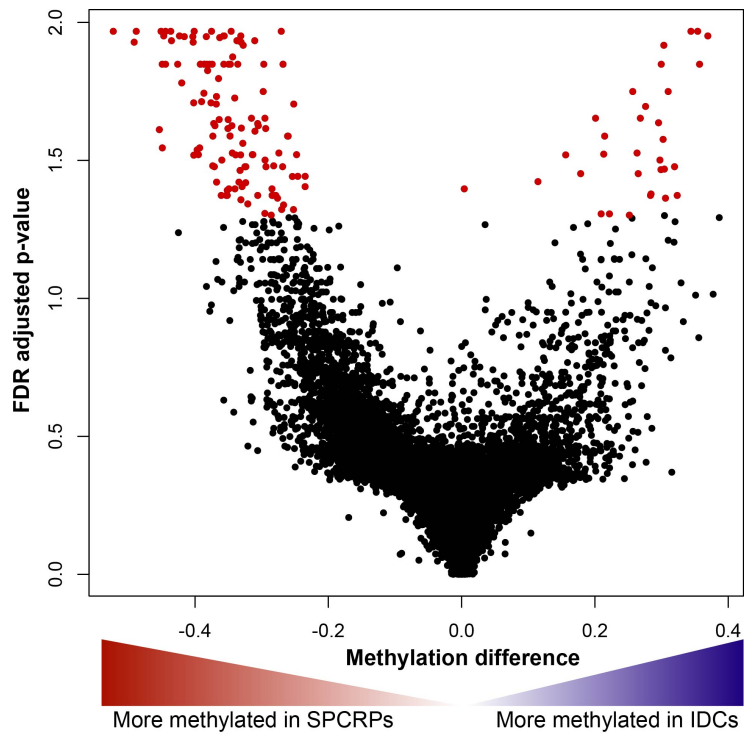

Figure S3

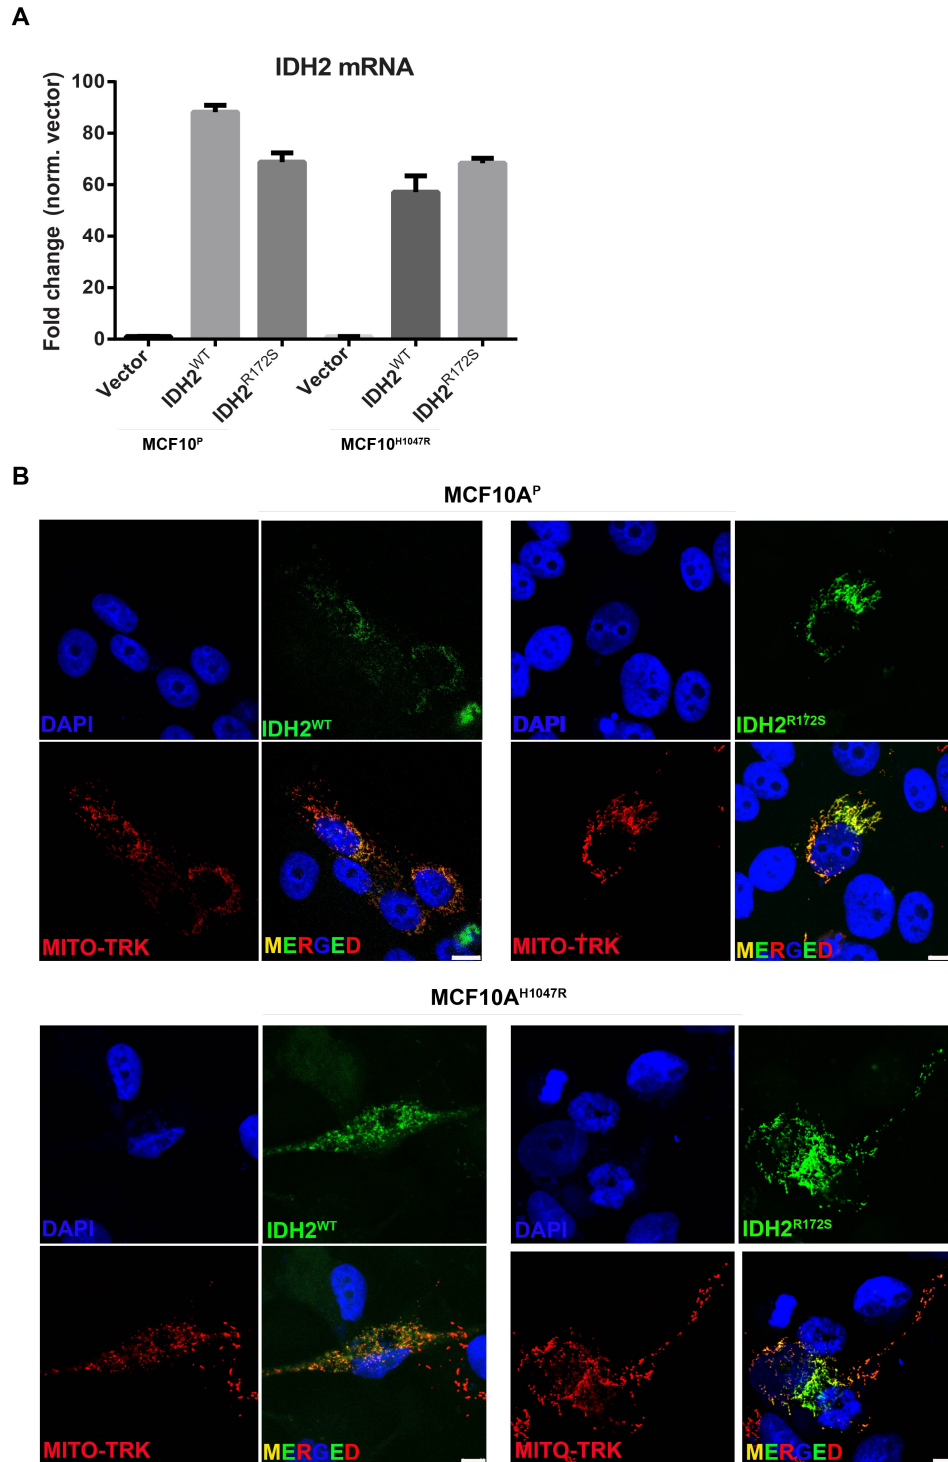

Figure S4

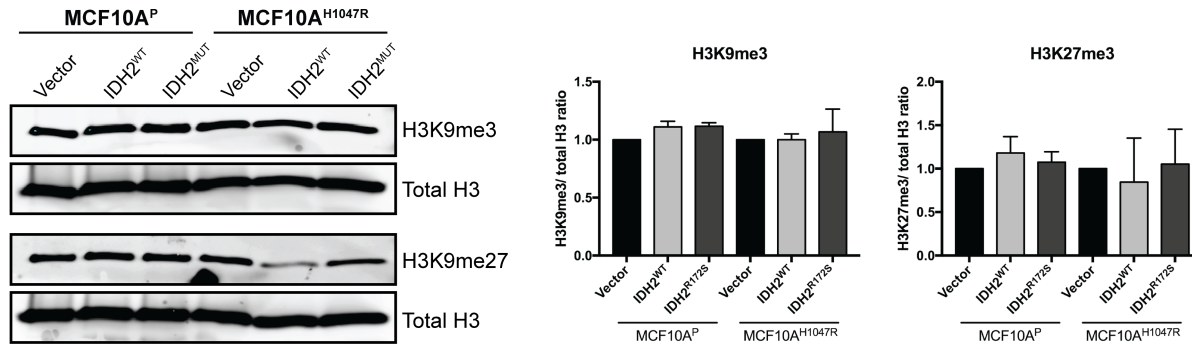

**Figure S5**

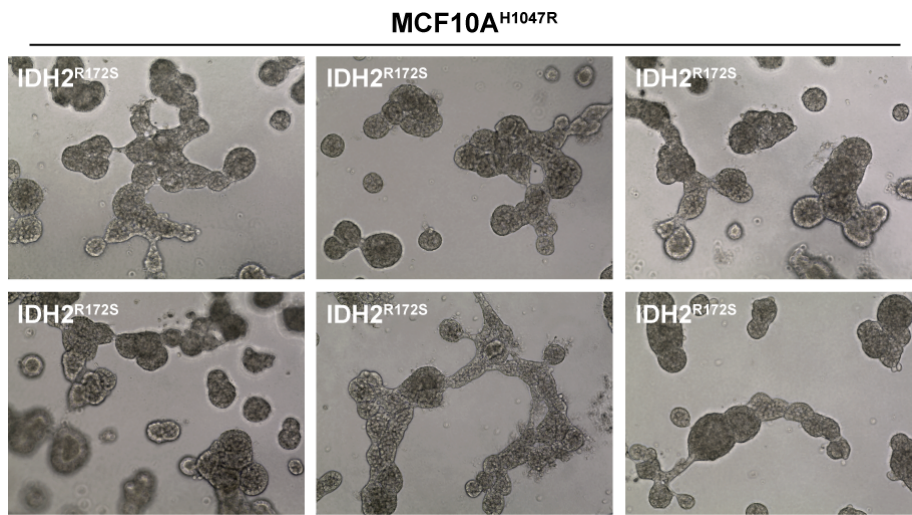

**Table S1.** Antibodies used for immunohistochemistry.

| <b>Antibody</b>   | <b>Clone/Source</b>    | <b>Dilution</b> |
|-------------------|------------------------|-----------------|
| Calponin          | CALP/ DAKO             | 1:250           |
| SMMHC             | SMMS-1/ DAKO           | RTU             |
| p63               | BC4A4/ BIOCARE         | 1:200           |
| CK AE1/AE3        | AE1/AE3 /DAKO          | RTU             |
| CK7               | OV-TL12/30/ DAKO       | RTU             |
| CK5/6             | D5/16B4/ DAKO          | RTU             |
| CK 34 $\beta$ E12 | 34 $\beta$ E12/ DAKO   | RTU             |
| E-cadherin        | 36B5/ Leica            | RTU             |
| H3K27me3          | C36B11/ CST            | 1:100           |
| MUC1              | MA552/ Leica           | 1:50            |
| ER                | SP1/ Thermo Scientific | 1:50            |
| PR                | PgR636 /DAKO           | RTU             |
| AR                | AR441/ DAKO            | 1:50            |
| HER2              | HercepTest/ DAKO       | RTU             |
| Mammaglobin       | 304-1A5/ DAKO          | RTU             |
| GCDFP-15          | 23A3/ DAKO             | RTU             |
| TTF-1             | SPT24/ LEICA           | 1:25            |
| Thyroglobulin     | R-Polyclonal /DAKO     | RTU             |

AR, androgen receptor; CK, cytokeratin; ER, estrogen receptor; GCDFP-15, gross cystic disease fluid protein-15; PR, progesterone receptor; RTU, ready to use; SMMHC, smooth muscle myosin heavy chain; TTF-1, thyroid transcription factor-1.

**Table S2.** SNaPshot tumor genotyping assay.

| Gene     | Amino acid - cDNA residue | Gene   | Amino acid - cDNA residue | Gene          | Amino acid - cDNA residue    |
|----------|---------------------------|--------|---------------------------|---------------|------------------------------|
| AKT1     | E17 - 49G                 | HRAS   | G12 - 35G                 | PIK3CA        | E545-1634A                   |
| APC      | R1114 - 3340C             | HRAS   | G13 - 37G                 | PIK3CA        | Q546 - 1636C                 |
| APC      | Q1338 - 4012C             | HRAS   | G13 - 38G                 | PIK3CA        | Q546 - 1637A                 |
| APC      | R1450 - 4348C             | HRAS   | Q61 - 181C                | PIK3CA        | H1047 - 3139C                |
| APC      | T1556fs*3 - 4666_667insA  | HRAS   | Q61 - 182A                | PIK3CA        | H1047 - 3140A                |
| BRAF     | G466 - 1397G              | HRAS   | Q61 - 183A                | PIK3CA        | G1049 - 3145G                |
| BRAF     | G469 - 1406G              | IDH1   | R132 - 394C               | PTEN          | R130 - 388C                  |
| BRAF     | L597 - 1789C              | IDH1   | R132 - 395G               | PTEN          | R173 - 517C                  |
| BRAF     | V600 - 1798G              | IDH2   | R140 - 418G               | PTEN          | R233 - 697C                  |
| BRAF     | V600 - 1799T              | IDH2   | R140 - 419G               | PTEN          | K267fs* - 800delA            |
| CTNNB1   | D32 - 94G                 | IDH2   | R172 - 514A               | RET           | M918 - 2753T                 |
| CTNNB1   | D32 - 95A                 | IDH2   | R172 - 515G               | TP53          | R175-524G                    |
| CTNNB1   | S33 - 98C                 | IDH2   | R172 - 516G               | TP53          | G245 - 733G                  |
| CTNNB1   | G34 - 101G                | KIT    | D816 - 2447A              | TP53          | R248 - 742C                  |
| CTNNB1   | S37 - 109T                | KRAS   | G12 - 34G                 | TP53          | R248 - 743G                  |
| CTNNB1   | S37 - 110C                | KRAS   | G12 - 35G                 | TP53          | R273-817C                    |
| CTNNB1   | T41 - 121A                | KRAS   | G13 - 38G                 | TP53          | R273 - 818G                  |
| CTNNB1   | T41 - 122C                | KRAS   | G13 - 37G                 | TP53          | R306 - 916C                  |
| CTNNB1   | S45 - 133T                | KRAS   | Q61 - 181C                |               |                              |
| CTNNB1   | S45 - 134C                | KRAS   | Q61 - 182A                | Sizing assay: |                              |
| EGFR     | G719 - 2155G              | KRAS   | A146 - 436G               | EGFR          | exon 19 deletions            |
| EGFR     | G719 - 2156G              | KRAS   | A146 - 437C               | EGFR          | exon 20 insertions/deletions |
| EGFR     | T790 - 2369C              | MAP2K1 | Q56 - 167A                | ERBB2         | exon 20 insertions           |
| EGFR     | L858 - 2573T              | MAP2K1 | K57 - 171G                |               |                              |
| EGFR     | L861 - 2582T              | MAP2K1 | D67 - 199G                |               |                              |
| EGFR     | E746_A750 - 2235_2249del  | NOTCH1 | L1575 - 4724T             |               |                              |
| EGFR     | E746_A750 - 2236_2250del  | NOTCH1 | L1601 - 4802T             |               |                              |
| EML4-ALK | L1996 - 4493C             | NRAS   | G12 - 35G                 |               |                              |
| FGFR3    | R248 - 742C               | NRAS   | G12 - 35G                 |               |                              |
| FGFR3    | S249 - 746C               | NRAS   | G13 - 37G                 |               |                              |
| FGFR3    | G370 - 1108C              | NRAS   | G13 - 38G                 |               |                              |
| FGFR3    | Y373 - 1118A              | NRAS   | Q61 - 181C                |               |                              |
| GNA11    | Q209 - 626A               | NRAS   | Q61 - 183G                |               |                              |
| GNAQ     | Q209 - 626A               | NRAS   | Q61 - 183A                |               |                              |
| GNAS     | R201 - 601C               | PIK3CA | R88 - 263G                |               |                              |
| GNAS     | R201 - 602G               | PIK3CA | E542 - 1624G              |               |                              |
| HRAS     | G12 - 34G                 | PIK3CA | E545 - 1633G              |               |                              |

**Table S3.** Primers used for Sanger sequencing analysis.

| <b>Sanger sequencing primers <i>IDH2</i> and <i>PIK3CA</i> hotspots</b> |                        |                          |
|-------------------------------------------------------------------------|------------------------|--------------------------|
|                                                                         | <b>Forward</b>         | <b>Reverse</b>           |
| <b>IDH2 R172</b>                                                        | GGTGCCCAGGTCAGTGGAT    | GCTGTGTTGTTGCTTGGGGT     |
| <b>IDH2 R140</b>                                                        | CGTGCCTGCCAATGGTGAT    | TCAAATTCTGGTTGAAAGATGGC  |
| <b>PIK3CA</b>                                                           | CTGTGAATCCAGAGGGGAAA   | GCACTTACCTGTGACTCCATAGAA |
| <b>PIK3CA H1047</b>                                                     | TGGAATCCAGAGTGAGCTTTC  | CTCAATGATGCTTGGCTCTG     |
| <b>TET2_AA23/24</b>                                                     | ATGGCCCCGAAGCAAGCC     | ACTTGGTGTCTCCATTTACTTCTG |
| <b>TET2_AA268</b>                                                       | ATCCAGATTGTGTTTCCATTGC | CATTATCAGCATCATCAGCATCA  |
| <b>TET2_AA429</b>                                                       | ACCACCACCACCATCACAAT   | GTAGATGGATTAGGACTCTGGGA  |

| <b>Sanger sequencing primers plasmid genotyping</b> |                       |                      |
|-----------------------------------------------------|-----------------------|----------------------|
|                                                     | <b>Forward</b>        | <b>Reverse</b>       |
| <b>IDH2 R172</b>                                    | AGTTCAAGCTGAAGAAGATGT | CTCGTCGGTGTTGTACATGC |



**Table S4.** Whole exome and targeted capture massively parallel sequencing statistics.

| Sample    | Sample Type | Sequencing Type | Target Territory | Total Reads | PCT Selected Bases | Mean Target Coverage | PCT TARGET BASES 2X | PCT TARGET BASES 10X | PCT TARGET BASES 20X | PCT TARGET BASES 30X | PCT TARGET BASES 40X | PCT TARGET BASES 50X | PCT TARGET BASES 100X |
|-----------|-------------|-----------------|------------------|-------------|--------------------|----------------------|---------------------|----------------------|----------------------|----------------------|----------------------|----------------------|-----------------------|
| SPCRP10 N | Normal      | Whole exome     | 51542852         | 89737793    | 90.04%             | 111.4                | 91.45%              | 85.88%               | 81.18%               | 77.25%               | 73.55%               | 69.91%               | 49.62%                |
| SPCRP10 T | Tumor       | Whole exome     | 51542852         | 120904304   | 86.11%             | 142.0                | 92.33%              | 87.86%               | 83.80%               | 80.47%               | 77.43%               | 74.52%               | 59.69%                |
| SPCRP13 N | Normal      | Whole exome     | 51542852         | 196656130   | 58.62%             | 112.5                | 94.95%              | 91.31%               | 88.66%               | 85.34%               | 81.42%               | 77.10%               | 51.35%                |
| SPCRP13 T | Tumor       | Whole exome     | 51542852         | 271215295   | 76.55%             | 211.5                | 94.66%              | 91.87%               | 90.19%               | 88.42%               | 86.49%               | 84.41%               | 73.10%                |
| SPCRP5 T  | Tumor       | MSK-IMPACT 410  | 1362579          | 34470791    | 85.42%             | 734.3                | 99.32%              | 99.10%               | 98.97%               | 98.86%               | 98.76%               | 98.63%               | 97.78%                |
| SPCRP11 T | Tumor       | MSK-IMPACT 410  | 1362579          | 57985946    | 63.85%             | 572.7                | 99.51%              | 99.37%               | 99.24%               | 99.14%               | 99.02%               | 98.92%               | 98.41%                |

**Table S5.** Non-synonymous somatic single nucleotide variants and small insertion/deletions identified in SPCRps subjected to whole-exome and targeted massively parallel sequencing.

| Tumor Sample | Effect                                 | Gene        | AA           | Tumor Depth | Normal Depth | Tumor MAF | Normal MAF | CHROM | POS       | REF   | ALT | Mutation Tester | CHASM           | FATHMM          | EXAC Frequency | Cancer Gene Census | Kandath et al (127 genes) | Lawrence et al (6000+ genes) |
|--------------|----------------------------------------|-------------|--------------|-------------|--------------|-----------|------------|-------|-----------|-------|-----|-----------------|-----------------|-----------------|----------------|--------------------|---------------------------|------------------------------|
| SPCRP13      | missense_variant                       | NBPF1       | p.Ser891Asn  | 27          | 28           | 18.50%    | 0.00%      | 1     | 16893841  | C     | T   |                 | Passenger       |                 | 0.1105         |                    |                           | TRUE                         |
| SPCRP13      | stop_gained                            | RNF1C3      | p.Ser111*    | 327         | 208          | 38.80%    | 0.00%      | 1     | 180868724 | C     | G   | A               | Passenger       |                 |                |                    |                           |                              |
| SPCRP13      | missense_variant                       | NBPF10      | p.Tyr35Ser   | 16          | 8            | 37.50%    | 0.00%      | 1     | 145253628 | G     | C   | N               | Passenger       |                 | 0.0836         |                    |                           |                              |
| SPCRP13      | missense_variant                       | LMOD1       | p.Val11Glu   | 456         | 167          | 3.30%     | 0.00%      | 1     | 201915437 | A     | T   | D               | Passenger       | PASSENGER/OTHER |                |                    |                           |                              |
| SPCRP13      | frameshift_variant                     | BIRC6       | p.Ile3500fs  | 184         | 124          | 33.52%    | 0.00%      | 2     | 32738151  | ATTCT |     |                 |                 |                 |                |                    |                           |                              |
| SPCRP13      | missense_variant                       | B3GALT1     | p.Arg214Trp  | 305         | 176          | 38.40%    | 0.00%      | 2     | 188726189 | C     | T   | D               | Passenger       | PASSENGER/OTHER | 8.24E-06       |                    |                           |                              |
| SPCRP13      | missense_variant                       | NWAP2       | p.Ala307Thr  | 407         | 261          | 3.20%     | 0.00%      | 2     | 226447352 | G     | A   | D               | Passenger       | PASSENGER/OTHER | 8.33E-06       |                    |                           |                              |
| SPCRP13      | missense_variant                       | PKNOX3      | p.Asn421Thr  | 89          | 74           | 10.10%    | 1.40%      | 3     | 138433350 | T     | G   | D               | Passenger       | CANCER          |                |                    |                           |                              |
| SPCRP13      | missense_variant                       | TECLR       | p.Leu214Val  | 116         | 58           | 30.20%    | 0.00%      | 4     | 65175661  | A     | C   | N               | Passenger       | PASSENGER/OTHER |                |                    |                           |                              |
| SPCRP13      | frameshift_variant                     | PKCIR1      | p.Glu300fs   | 84          | 68           | 29.01%    | 0.00%      | 5     | 67578817  | AAC   | A   |                 |                 |                 |                | TRUE               | TRUE                      | TRUE                         |
| SPCRP13      | missense_variant                       | PCDHGA11    | p.Val627Gly  | 191         | 97           | 41.40%    | 1.00%      | 5     | 140802874 | T     | G   | D               | Passenger       | PASSENGER/OTHER |                |                    |                           |                              |
| SPCRP13      | missense_variant                       | HST1H2AH    | p.Leu404Arg  | 275         | 197          | 52.80%    | 0.00%      | 6     | 27115088  | T     | G   | D               | Passenger       | PASSENGER/OTHER |                |                    |                           |                              |
| SPCRP13      | missense_variant                       | AK9         | p.Leu1333His | 234         | 125          | 77.00%    | 0.00%      | 6     | 108531127 | A     | T   | D               | Passenger       | PASSENGER/OTHER |                |                    |                           |                              |
| SPCRP13      | missense_variant                       | ADGB        | p.Ile245Leu  | 69          | 59           | 13.00%    | 1.70%      | 6     | 146985457 | A     | C   | D               | Passenger       | PASSENGER/OTHER |                |                    |                           |                              |
| SPCRP13      | missense_variant                       | PLOD3       | p.Val238Met  | 178         | 100          | 36.50%    | 0.00%      | 7     | 100856453 | C     | T   | D               | Passenger       | PASSENGER/OTHER |                |                    |                           |                              |
| SPCRP13      | missense_variant                       | MGAM        | p.Ala1260Ser | 70          | 44           | 12.90%    | 2.30%      | 7     | 141758807 | G     | T   | N               | Passenger       | PASSENGER/OTHER | 0.0001573      |                    |                           |                              |
| SPCRP13      | missense_variant                       | IRNAE2      | p.Gly2188Ser | 303         | 228          | 39.40%    | 0.00%      | 9     | 7932628   | C     | T   | N               | Passenger       | PASSENGER/OTHER |                |                    |                           |                              |
| SPCRP13      | missense_variant                       | APBB1P      | p.Ala78Ser   | 341         | 251          | 34.30%    | 0.00%      | 10    | 26789819  | G     | T   | D               | Passenger       | PASSENGER/OTHER |                |                    |                           |                              |
| SPCRP13      | missense_variant                       | PLA2G12B    | p.Asp130Gly  | 383         | 209          | 4.20%     | 0.00%      | 10    | 74701004  | T     | C   | D               | Passenger       | PASSENGER/OTHER |                |                    |                           |                              |
| SPCRP13      | missense_variant                       | CALHM3      | p.Arg72Tyr   | 59          | 53           | 37.30%    | 0.00%      | 10    | 105238576 | G     | A   | D               | Passenger       | PASSENGER/OTHER |                |                    |                           |                              |
| SPCRP13      | missense_variant                       | INP9F       | p.Ser909Phe  | 441         | 272          | 11.80%    | 0.00%      | 10    | 121586607 | C     | T   | D               | Passenger       | PASSENGER/OTHER |                |                    |                           |                              |
| SPCRP13      | frameshift_variant                     | AF3A2       | p.His309fs   | 274         | 146          | 29.62%    | 0.68%      | 11    | 980921    | A     | ACG |                 |                 |                 |                |                    |                           |                              |
| SPCRP13      | missense_variant                       | ORS1B4      | p.Leu154Phe  | 417         | 309          | 7.70%     | 0.33%      | 11    | 6322715   | C     | A   | N               | Passenger       | PASSENGER/OTHER |                |                    |                           |                              |
| SPCRP13      | missense_variant                       | C11orf85    | p.Val72Leu   | 90          | 50           | 12.20%    | 2.00%      | 11    | 64717836  | C     | A   | D               | Passenger       | PASSENGER/OTHER |                |                    |                           |                              |
| SPCRP13      | missense_variant                       | KRTAP5-7    | p.Val59Ile   | 97          | 45           | 5.20%     | 0.00%      | 11    | 71238461  | G     | A   | N               | Passenger       | PASSENGER/OTHER | 0.001803       |                    |                           |                              |
| SPCRP13      | missense_variant                       | CR3         | p.Glu61Lys   | 43          | 51           | 18.60%    | 2.00%      | 11    | 8808242   | C     | T   | D               | Passenger       | PASSENGER/OTHER | 2.56E-05       |                    |                           |                              |
| SPCRP13      | missense_variant                       | HTRF8       | p.Arg332His  | 291         | 137          | 4.10%     | 0.73%      | 11    | 119815382 | A     | G   | N               | Passenger       | PASSENGER/OTHER | 1.65E-05       |                    |                           |                              |
| SPCRP13      | missense_variant                       | DEPDC4      | p.Ala73Val   | 124         | 106          | 43.90%    | 0.00%      | 12    | 100657611 | G     | A   | N               | Passenger       | PASSENGER/OTHER |                |                    |                           |                              |
| SPCRP13      | missense_variant                       | RILPL2      | p.Ser150Ala  | 93          | 40           | 44.60%    | 0.00%      | 12    | 123815098 | A     | C   | N               | Passenger       | PASSENGER/OTHER |                |                    |                           |                              |
| SPCRP13      | missense_variant                       | OR6S1       | p.His247Asp  | 339         | 202          | 43.40%    | 0.50%      | 14    | 21109112  | G     | C   | D               | Passenger       | PASSENGER/OTHER |                |                    |                           |                              |
| SPCRP13      | missense_variant                       | MIR625      | p.Pro121Leu  | 290         | 162          | 3.80%     | 0.62%      | 14    | 23326260  | C     | T   | N               | Passenger       | PASSENGER/OTHER |                |                    |                           |                              |
| SPCRP13      | missense_variant                       | ADAM21      | p.Pro685Leu  | 336         | 245          | 40.90%    | 0.00%      | 14    | 70929270  | C     | T   | N               | Passenger       | PASSENGER/OTHER | 4.96E-05       |                    |                           |                              |
| SPCRP13      | missense_variant                       | ZFYVE1      | p.Ile169Phe  | 139         | 80           | 17.30%    | 2.50%      | 14    | 73485002  | T     | A   | D               | Passenger       | PASSENGER/OTHER |                |                    |                           |                              |
| SPCRP13      | missense_variant                       | ALKBH1      | p.His176Asn  | 264         | 130          | 36.90%    | 0.77%      | 14    | 78146243  | G     | D   | Passenger       | PASSENGER/OTHER |                 |                |                    |                           |                              |
| SPCRP13      | missense_variant                       | SCAPER      | p.Ser232Glu  | 222         | 137          | 60.50%    | 0.73%      | 15    | 77057276  | C     | T   | D               | Passenger       | PASSENGER/OTHER |                |                    |                           |                              |
| SPCRP13      | missense_variant                       | PLA2G1B     | p.Asn146Ser  | 170         | 85           | 14.70%    | 0.00%      | 15    | 14765691  | A     | C   | D               | Passenger       | PASSENGER/OTHER | 8.28E-06       |                    |                           |                              |
| SPCRP13      | missense_variant                       | MFG8E       | p.Val54Met   | 225         | 125          | 4.00%     | 0.00%      | 15    | 89453095  | C     | T   | N               | Passenger       | PASSENGER/OTHER |                |                    |                           |                              |
| SPCRP13      | missense_variant                       | IDH2        | p.Arg172Ser  | 323         | 146          | 54.30%    | 0.00%      | 15    | 90631837  | C     | G   | D               | Driver          | CANCER          |                | TRUE               | TRUE                      | TRUE                         |
| SPCRP13      | missense_variant                       | TMC5        | p.Ile933Leu  | 224         | 87           | 5.80%     | 1.10%      | 16    | 19503521  | A     | C   | D               | Passenger       | PASSENGER/OTHER |                |                    |                           |                              |
| SPCRP13      | missense_variant                       | KCTD13      | p.Gly1Arg    | 289         | 88           | 30.10%    | 0.00%      | 16    | 29937174  | C     | T   | D               | Passenger       | PASSENGER/OTHER |                |                    |                           |                              |
| SPCRP13      | missense_variant                       | p.Ser744Phe |              | 303         | 157          | 40.20%    | 0.00%      | 16    | 14816309  | A     | C   | D               | Passenger       | PASSENGER/OTHER |                | TRUE               |                           |                              |
| SPCRP13      | missense_variant                       | NINL        | p.Asp1147Glu | 165         | 64           | 5.50%     | 0.00%      | 20    | 25443160  | A     | T   | N               | Passenger       | PASSENGER/OTHER |                |                    |                           |                              |
| SPCRP13      | missense_variant                       | BPIFA1      | p.Phe197Leu  | 90          | 64           | 13.30%    | 0.00%      | 20    | 13829199  | C     | N   | Passenger       | PASSENGER/OTHER |                 |                |                    |                           |                              |
| SPCRP13      | missense_variant                       | TOMM34      | p.Leu132Asp  | 124         | 92           | 20.20%    | 1.10%      | 20    | 43580629  | A     | C   | D               | Passenger       | PASSENGER/OTHER |                |                    |                           |                              |
| SPCRP13      | missense_variant                       | URD1        | p.Tyr180Cys  | 128         | 84           | 42.20%    | 1.60%      | 21    | 3375759   | T     | C   | N               | Passenger       | PASSENGER/OTHER |                |                    |                           |                              |
| SPCRP10      | stop_gained                            | AHC1        | p.Lys190*    | 178         | 180          | 33.00%    | 0.00%      | 1     | 2781939   | G     | A   |                 |                 |                 |                |                    |                           |                              |
| SPCRP10      | splice_acceptor_variant/intron_variant | GPD2        | p.Gln390*    | 200         | 160          | 26.00%    | 0.00%      | 2     | 157425336 | G     | A   | D               |                 |                 |                |                    |                           |                              |
| SPCRP10      | missense_variant                       | CRTPA       | p.Ala166Thr  | 34          | 32           | 32.40%    | 0.00%      | 3     | 33181860  | G     | A   | D               | Passenger       | PASSENGER/OTHER | 4.12E-05       |                    |                           |                              |
| SPCRP10      | missense_variant                       | TMPRSS11B   | p.Gly368Arg  | 68          | 48           | 25.00%    | 0.00%      | 4     | 69003778  | C     | T   | D               | Passenger       | PASSENGER/OTHER |                |                    |                           |                              |
| SPCRP10      | missense_variant                       | SILCA4      | p.Asp291Val  | 165         | 124          | 31.50%    | 0.00%      | 4     | 7230367   | A     | T   | D               | Passenger       | PASSENGER/OTHER |                |                    |                           | TRUE                         |
| SPCRP10      | missense_variant                       | GAU1        | p.Gln120Ser  | 172         | 154          | 44.20%    | 0.00%      | 4     | 17416039  | A     | T   | D               | Passenger       | PASSENGER/OTHER |                |                    |                           |                              |
| SPCRP10      | frameshift_variant                     | PKCIR1      | p.Gln455fs   | 16          | 34           | 31.20%    | 0.00%      | 5     | 67595959  | TCA   | A   |                 |                 |                 |                |                    |                           | TRUE                         |
| SPCRP10      | missense_variant                       | DLK2        | p.Cys7Tyr    | 65          | 63           | 12.30%    | 0.00%      | 6     | 43422544  | C     | T   | D               | Passenger       | PASSENGER/OTHER |                |                    |                           |                              |
| SPCRP10      | missense_variant                       | MUC3A       | p.Thi530Ala  | 51          | 265          | 41.20%    | 4.70%      | 7     | 100551007 | A     | G   |                 |                 |                 |                |                    |                           | 0.003414                     |
| SPCRP10      | frameshift_variant                     | CFTR        | p.Leu1258fs  | 124         | 79           | 24.90%    | 0.00%      | 7     | 117229241 | C     | CT  |                 |                 |                 |                |                    |                           |                              |
| SPCRP10      | missense_variant                       | PW12        | p.Met835Leu  | 106         | 88           | 34.90%    | 0.00%      | 11    | 12375998  | A     | C   | D               | Passenger       | PASSENGER/OTHER |                |                    |                           |                              |
| SPCRP10      | missense_variant                       | EMC2        | p.Asp170Glu  | 76          | 60           | 22.40%    | 0.00%      | 8     | 10948811  | C     | D   | Passenger       | PASSENGER/OTHER |                 |                |                    |                           |                              |
| SPCRP10      | missense_variant                       | VPS13A      | p.Leu1318Pro | 118         | 102          | 33.90%    | 0.00%      | 9     | 79917965  | T     | C   | D               | Passenger       | PASSENGER/OTHER |                |                    |                           |                              |
| SPCRP10      | missense_variant                       | G1QTNF4     | p.Ser232Glu  | 77          | 57           | 6.50%     | 0.00%      | 11    | 47812274  | G     | A   | D               | Passenger       | PASSENGER/OTHER |                |                    |                           |                              |
| SPCRP10      | missense_variant                       | TME142B     | p.Pro148Ser  | 106         | 88           | 15.10%    | 0.00%      | 11    | 12375998  | A     | C   | D               | Passenger       | PASSENGER/OTHER |                |                    |                           |                              |
| SPCRP10      | missense_variant                       | TLN2        | p.Ala195Tyr  | 81          | 68           | 43.20%    | 0.00%      | 15    | 6304966   | G     | A   | D               | Passenger       | PASSENGER/OTHER | 5.88E-05       |                    |                           |                              |
| SPCRP10      | missense_variant                       | IDH2        | p.Arg172Gly  | 129         | 107          | 28.90%    | 0.94%      | 15    | 90631839  | T     | C   | D               | Driver          | CANCER          |                | TRUE               | TRUE                      | TRUE                         |
| SPCRP10      | missense_variant                       | STAT3       | p.Phe384Leu  | 112         | 104          | 54.00%    | 0.00%      | 17    | 40441653  | A     | T   | D               | Passenger       | PASSENGER/OTHER |                | TRUE               |                           |                              |
| SPCRP10      | missense_variant                       | C3          | p.Asn760Asp  | 139         | 96           | 6.50%     | 0.00%      | 19    | 6702558   | T     | C   | N               | Passenger       | PASSENGER/OTHER |                |                    |                           |                              |
| SPCRP10      | missense_variant                       | CUL2        | p.Asp202Gly  | 79          | 62           | 34.20%    | 0.00%      | 19    | 1963370   | G     | A   | N               | Passenger       | PASSENGER/OTHER |                |                    |                           |                              |
| SPCRP10      | missense_variant                       | ZNF524      | p.Arg44Tyr   | 160         | 128          | 21.90%    | 0.78%      | 19    | 56113608  | C     | T   | N               | Passenger       | PASSENGER/OTHER | 1.09E-05       |                    |                           |                              |
| SPCRP10      | missense_variant                       | ZC3H7B      | p.Asp493Gly  | 184         | 157          | 40.00%    | 0.00%      | 22    | 41742025  | A     | G   | D               | Passenger       | PASSENGER/OTHER | 4.12E-05       |                    |                           |                              |
| SPCRP10      | missense_variant                       | NROB1       | p.Ile444Thr  | 119         | 102          | 14.30%    | 0.00%      | X     | 30322778  | A     | G   | D               | Passenger       | PASSENGER/OTHER |                |                    |                           |                              |
| SPCRP10      | missense_variant                       | CCDC120     | p.Ser2AAsn   | 23          | 29           | 21.70%    | 0.00%      | X     | 48920089  | G     | A   | N               | Passenger       | PASSENGER/OTHER |                |                    |                           | TRUE                         |
| SPCRP5       | missense_variant                       | MPL         | p.Phe105Leu  | 541         | 271          | 46.40%    | 0.00%      | 1     | 4383413   | T     | C   | N               | Passenger       | PASSENGER/OTHER | 0.0001153      | TRUE               | TRUE                      | TRUE                         |
| SPCRP5       | missense_variant                       | PK3CA       | p.Cys420Asp  | 111         | 157          | 24.32%    | 0.64%      | 3     | 17892790  | T     | C   | D               | Passenger       | CANCER          |                | TRUE               | TRUE                      | TRUE                         |
| SPCRP5       | missense_variant                       | ATM         | p.Ser49Cys   | 159         | 292          | 49.00%    | 0.00%      | 11    | 10809576  | C     | G   | N               | Passenger       | CANCER          |                | 0.007373           | TRUE                      | TRUE                         |
| SPCRP        |                                        |             |              |             |              |           |            |       |           |       |     |                 |                 |                 |                |                    |                           |                              |
