# Supplementary material
Source: PubMed Central journal article supplement (PMC5502804)
Supplement: NIHMS826990-supplement-3.pdf [file NIHMS826990-supplement-3.pdf]

**Figure S1. Sanger sequencing traces of *IDH2* and *PIK3CA* hotspot mutations identified in SPCRPs.** Mutations are highlighted with a black arrow.

**Figure S2. DNA methylation profile of *IDH2/TET2*-mutant SPCRPs.**

Scatter plot of methylation difference between *IDH2/TET2*-mutant SPCRPs and *IDH2/TET2* wild-type IDCs. Red dots indicate statistically significant differentially methylated genes between *IDH2/TET2*-mutant SPCRPs and *IDH2/TET2* wild-type IDCs (FDR adjusted p-value <0.05).

**Figure S3. *IDH2* expression in non-malignant breast epithelial cells.**

(A) Forced expression of wild-type *IDH2* ( $IDH2^{WT}$ ) and R172S-mutant *IDH2* ( $IDH2^{R172S}$ ) leads to an increase in *IDH2* mRNA in parental MCF10A ( $MCF10A^P$ ) and *PIK3CA* H1047R-mutant MCF10A ( $MCF10A^{H1047R}$ ) cells. Error bars represent standard deviation of mean. (B) Forced expression of  $IDH2^{WT}$  and  $IDH2^{R172S}$  in  $MCF10A^P$  and  $MCF10A^{H1047R}$  cells leads to *IDH2* protein mitochondrial localization. Blue, DAPI; green,  $IDH2^{WT}$  and  $IDH2^{R172S}$ ; red, Mito-tracker (scale bar, 7.5 $\mu$ m).

**Figure S4. Downstream effects of *IDH2* expression in non-malignant breast epithelial cells.**

Whole cell lysates of  $MCF10A^P$  and  $MCF10A^{H1047R}$  cells were analyzed for H3K9me3, H3K27me3 and total H3 protein expression by western blotting (left), and quantified using near-infrared detection (LI-COR; Odyssey) (right); error bars represent standard deviation of mean.

**Figure S5. Representative micrographs obtained from *PIK3CA* H1047R-mutant MCF10A cells transiently expressing R172S-mutant *IDH2*.**

$IDH2^{R172S}$  expression in  $MCF10A^{H1047R}$  cells led to the formation of anastomosing solid cell nests/cell nodules.
